# Supplementary material for: The Tunable Electronic and Optical Properties of Two-Dimensional Bismuth Oxyhalides
Source: MDPI journal article supplement (doi:10.3390/nano13202798), 2023-10-20
Supplement: s1 [file s1]

**Table S1.** The calculated lattice parameters constants  $a$  (Å) of BiOX ( $X = \text{Cl}, \text{Br}, \text{I}, \text{Cl}_{0.5}\text{Br}_{0.5}, \text{Br}_{0.5}\text{I}_{0.5}, \text{Cl}_{0.5}\text{I}_{0.5}$ ) monolayer.

| System                    | BiOCl | BiOCl <sub>0.5</sub> Br <sub>0.5</sub> | BiOBr | BiOCl <sub>0.5</sub> I <sub>0.5</sub> | BiOBr <sub>0.5</sub> I <sub>0.5</sub> | BiOI  |
|---------------------------|-------|----------------------------------------|-------|---------------------------------------|---------------------------------------|-------|
| $a$ (Å)                   | 3.876 | 3.900                                  | 3.926 | 3.945                                 | 3.970                                 | 4.015 |
| Ref. <sup>39</sup> (Cal.) | 3.889 |                                        | 3.930 |                                       |                                       | 4.014 |
| Ref. <sup>23</sup> (Cal.) | -     |                                        | -     |                                       |                                       | 4.020 |
| Ref. <sup>40</sup> (Exp.) | 3.890 |                                        | 3.916 |                                       |                                       | 3.985 |

**Table S2.** The calculated HSE06-based band gaps of BiOX ( $X = \text{Cl}, \text{Br}, \text{I}$ ) monolayer.

| System                    | BiOCl | BiOBr | BiOI  |
|---------------------------|-------|-------|-------|
| Band gap (eV)             | 3.745 | 3.354 | 2.278 |
| Ref. <sup>39</sup> (Cal.) | 3.79  | 3.41  | 2.3   |
| Ref. <sup>23</sup> (Cal.) | -     | -     | 2.28  |

**Table S3.** The variation of calculated static dielectric constant  $\epsilon(0)$  and static refractive index  $n(0)$  of BiOX ( $X = \text{Cl}, \text{Br}, \text{I}$ ) with the layer numbers.

| System   | BiOCl         |        | BiOBr         |        | BiOI          |        |
|----------|---------------|--------|---------------|--------|---------------|--------|
|          | $\epsilon(0)$ | $n(0)$ | $\epsilon(0)$ | $n(0)$ | $\epsilon(0)$ | $n(0)$ |
| 1 Layer  | 1.70          | 1.30   | 1.83          | 1.35   | 2.15          | 1.47   |
| 2 Layers | 2.23          | 1.49   | 2.41          | 1.55   | 3.08          | 1.75   |
| 3 Layers | 2.49          | 1.58   | 2.78          | 1.67   | 3.42          | 1.85   |
| 4 Layers | 2.81          | 1.68   | 3.17          | 1.78   | 3.98          | 1.99   |
| 5 Layers | 2.93          | 1.71   | 3.28          | 1.81   | 4.26          | 2.06   |
| Bulk     | 4.41          | 2.10   | 4.96          | 2.23   | 6.22          | 2.49   |

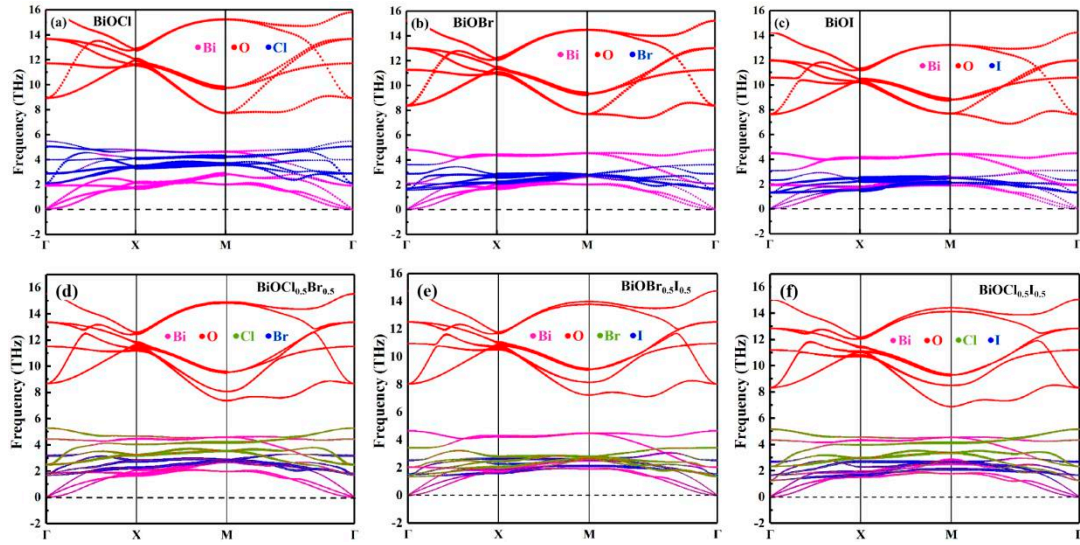**Figure S1.** (a-f) The phonon spectra of the BiOX ( $X = \text{Cl}, \text{Br}, \text{I}, \text{Cl}_{0.5}\text{Br}_{0.5}, \text{Br}_{0.5}\text{I}_{0.5}, \text{Cl}_{0.5}\text{I}_{0.5}$ ) monolayer.  $\Gamma$ -X-M- $\Gamma$  are the high symmetric points.

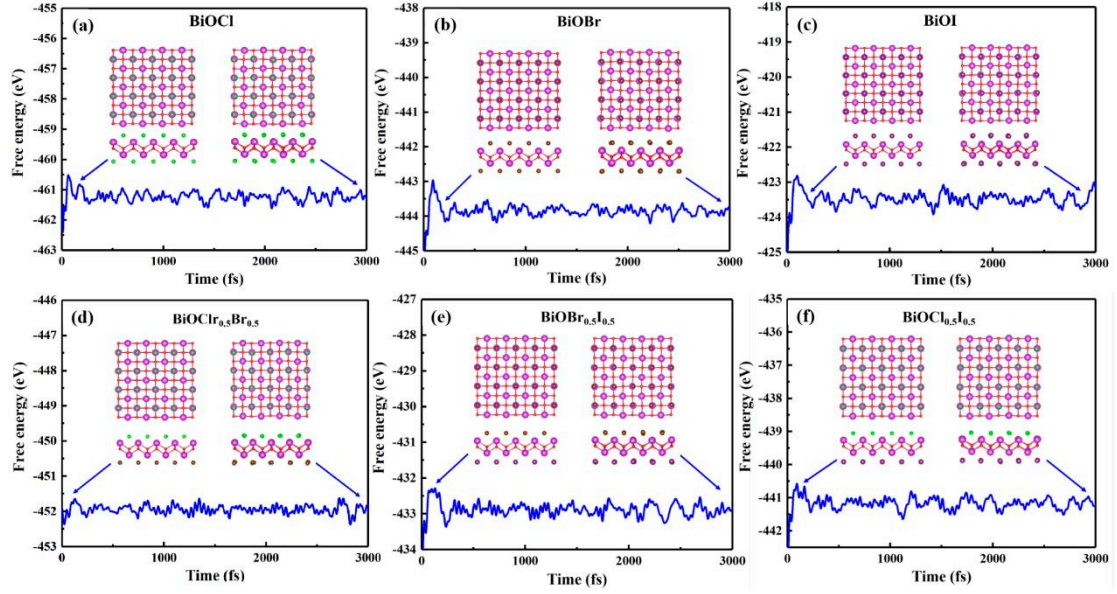

**Figure S2.** (a–f) The free energy variation in the AIMD simulation at constant temperature (300K) of the BiOX ( $X = \text{Cl}, \text{Br}, \text{I}, \text{Cl}_{0.5}\text{Br}_{0.5}, \text{Br}_{0.5}\text{I}_{0.5}, \text{Cl}_{0.5}\text{I}_{0.5}$ ) monolayer.

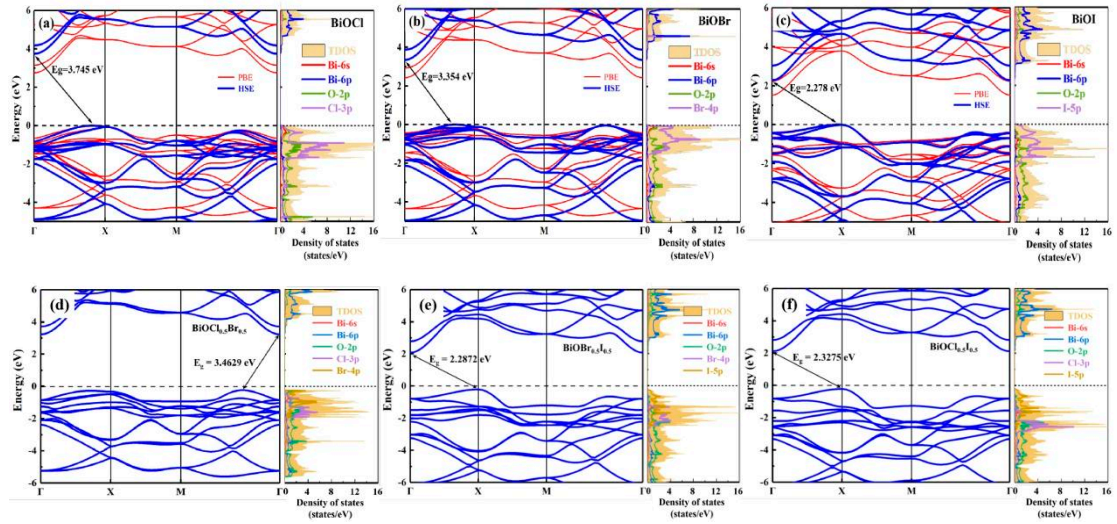

**Figure S3.** Left panels of (a–f): the band structures of the BiOX ( $X = \text{Cl}, \text{Br}, \text{I}, \text{Cl}_{0.5}\text{Br}_{0.5}, \text{Br}_{0.5}\text{I}_{0.5}, \text{Cl}_{0.5}\text{I}_{0.5}$ ) monolayers along the high-symmetry lines  $\Gamma$ – $X$ – $M$ – $\Gamma$ ; Right panels of (a–f): the total and projected DOS of the BiOX ( $X = \text{Cl}, \text{Br}, \text{I}, \text{Cl}_{0.5}\text{Br}_{0.5}, \text{Br}_{0.5}\text{I}_{0.5}, \text{Cl}_{0.5}\text{I}_{0.5}$ ) monolayer.

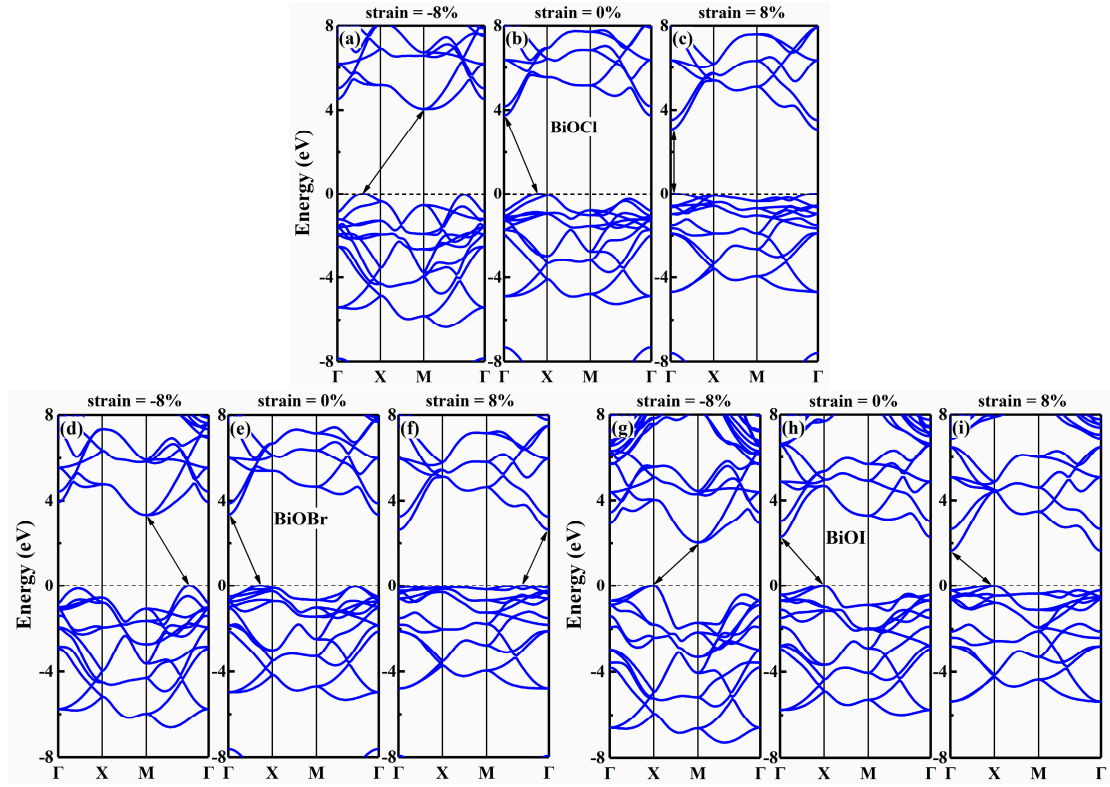

**Figure S4.** Band structures of (a)(b)(c) BiOCl, (d)(e)(f) BiOBr, and (g)(h)(i) BiOI monolayers under biaxial strain at -8%, 0% and 8%.
